# Supplementary material
Source: Springer Nature journal article supplement (https://www.springermedizin.de/resource/supplementary/12889_2011_3193_MOESM1_ESM.pdf/9488310)
Supplement: MOESM1 [file 9488310]

|                                             | <b>Group A</b> | <b>Group B</b> |
|---------------------------------------------|----------------|----------------|
| Age                                         | 50 years       | 40 years       |
| Alcoholic liver disease                     | Yes            | No             |
| Expected length of post-transplant survival | 5 years        | 5 years        |
| Time on waiting list                        | 12 months      | 3 months       |
| Retransplant                                | No             | Yes            |
